# Supplementary material for: Modifiable causes of premature death in middle-age in Western Europe: results from the EPIC cohort study
Source: PubMed Central journal article supplement (PMC4907105; doi:10.1186/s12916-016-0630-6), 2016-06-14
Supplement: 12916_2016_630_MOESM6_ESM.pdf [file 12916_2016_630_MOESM6_ESM.pdf]

S1 Table. Number of participants in the EPIC cohort: overall, for premature deaths (prior to age 70 years), by country of recruitment and sex.

| Country     | Total |         | Premature deaths |         | Sex   |         |        |         |
|-------------|-------|---------|------------------|---------|-------|---------|--------|---------|
|             |       |         |                  |         | Male  |         | Female |         |
|             | n     | percent | n                | percent | n     | percent | n      | percent |
| Denmark     | 56682 | 21      | 4058             | 34      | 26988 | 29      | 29694  | 17      |
| Italy       | 39357 | 15      | 1152             | 10      | 11909 | 13      | 27448  | 16      |
| UK          | 36700 | 14      | 1470             | 12      | 13592 | 15      | 23108  | 13      |
| Germany     | 30770 | 12      | 1252             | 10      | 14305 | 15      | 16465  | 10      |
| Sweden      | 27943 | 11      | 1599             | 13      | 10984 | 12      | 16959  | 10      |
| Netherlands | 26827 | 10      | 1143             | 10      | 4729  | 5       | 22098  | 13      |
| Greece      | 20543 | 8       | 582              | 5       | 8241  | 9       | 12302  | 7       |
| France      | 20454 | 8       | 457              | 4       | 0     | 0       | 20454  | 12      |
| Spain       | 5630  | 2       | 217              | 2       | 2039  | 2       | 3591   | 2       |
| Norway      | 0     | 0       | 0                | 0       | 0     | 0       | 0      | 0       |

Blood pressure was not collected in Norway, so no participants from Norway contributed to this analysis.
