# Supplementary material for: Modifiable causes of premature death in middle-age in Western Europe: results from the EPIC cohort study
Source: PubMed Central journal article supplement (PMC4907105; doi:10.1186/s12916-016-0630-6), 2016-06-14
Supplement: 12916_2016_630_MOESM7_ESM.pdf [file 12916_2016_630_MOESM7_ESM.pdf]

S2 Table. Distribution of covariates by country of recruitment.

|                                          |                          | Country |    |       |    |       |    |         |    |        |    |             |    |        |    |        |     |       |    |
|------------------------------------------|--------------------------|---------|----|-------|----|-------|----|---------|----|--------|----|-------------|----|--------|----|--------|-----|-------|----|
|                                          |                          | Denmark |    | Italy |    | UK    |    | Germany |    | Sweden |    | Netherlands |    | Greece |    | France |     | Spain |    |
|                                          |                          | n       | %  | n     | %  | n     | %  | n       | %  | n      | %  | n           | %  | n      | %  | n      | %   | n     | %  |
| Sex                                      | Male                     | 26988   | 48 | 11909 | 30 | 13592 | 37 | 14305   | 46 | 10984  | 39 | 4729        | 18 | 8241   | 40 | 0      | 0   | 2039  | 36 |
|                                          | Female                   | 29694   | 52 | 27448 | 70 | 23108 | 63 | 16465   | 54 | 16959  | 61 | 22098       | 82 | 12302  | 60 | 20454  | 100 | 3591  | 64 |
| Age at baseline (years)                  | [40,50)                  | 0       | 0  | 16119 | 41 | 10597 | 29 | 12455   | 40 | 5333   | 19 | 6167        | 23 | 6182   | 30 | 8031   | 39  | 2345  | 42 |
|                                          | [50,60)                  | 41451   | 73 | 17349 | 44 | 12279 | 33 | 11763   | 38 | 10859  | 39 | 14126       | 53 | 5648   | 27 | 8889   | 43  | 2193  | 39 |
|                                          | [60,70]                  | 15231   | 27 | 5697  | 14 | 10294 | 28 | 6551    | 21 | 9098   | 33 | 6530        | 24 | 6619   | 32 | 3528   | 17  | 1092  | 19 |
| Smoking                                  | Never smoker             | 19838   | 35 | 18303 | 47 | 18082 | 49 | 14583   | 47 | 10609  | 38 | 10091       | 38 | 12240  | 60 | 14437  | 71  | 3560  | 63 |
|                                          | Former smoker            | 17292   | 31 | 10482 | 27 | 13790 | 38 | 10158   | 33 | 9449   | 34 | 9339        | 35 | 3599   | 18 | 4376   | 21  | 906   | 16 |
|                                          | Current smoker           | 19552   | 34 | 10572 | 27 | 4828  | 13 | 6029    | 20 | 7885   | 28 | 7397        | 28 | 4704   | 23 | 1641   | 8   | 1164  | 21 |
| Blood pressure                           | normal                   | 8063    | 14 | 8553  | 22 | 8504  | 23 | 6234    | 20 | 2510   | 9  | 7580        | 28 | 3939   | 19 | 8003   | 39  | 1549  | 28 |
|                                          | Pre-hypert.              | 19981   | 35 | 16782 | 43 | 14705 | 40 | 12669   | 41 | 9171   | 33 | 11041       | 41 | 7450   | 36 | 8184   | 40  | 2280  | 40 |
|                                          | Hypert. 1                | 19080   | 34 | 10074 | 26 | 9416  | 26 | 8221    | 27 | 9647   | 35 | 5477        | 20 | 6010   | 29 | 3271   | 16  | 1233  | 22 |
|                                          | Hypert. 2                | 9558    | 17 | 3948  | 10 | 4075  | 11 | 3646    | 12 | 6615   | 24 | 2729        | 10 | 3144   | 15 | 996    | 5   | 568   | 10 |
| BMI (kg/m <sup>2</sup> )                 | <20                      | 2029    | 4  | 1322  | 3  | 1619  | 4  | 862     | 3  | 1581   | 6  | 1207        | 4  | 234    | 1  | 3113   | 15  | 34    | 1  |
|                                          | 20-21.9                  | 5805    | 10 | 4146  | 11 | 4674  | 13 | 2674    | 9  | 3690   | 13 | 3317        | 12 | 743    | 4  | 5187   | 25  | 140   | 2  |
|                                          | 22-24.9 (reference)      | 17086   | 30 | 11733 | 30 | 11950 | 33 | 8345    | 27 | 8931   | 32 | 8655        | 32 | 3268   | 16 | 6857   | 34  | 855   | 15 |
|                                          | 25-29.9 (overweight)     | 23531   | 42 | 16166 | 41 | 13930 | 38 | 13193   | 43 | 10435  | 37 | 10218       | 38 | 9000   | 44 | 4179   | 20  | 2727  | 48 |
|                                          | 30-34.9 (obese)          | 6529    | 12 | 4721  | 12 | 3544  | 10 | 4443    | 14 | 2691   | 10 | 2710        | 10 | 5367   | 26 | 892    | 4   | 1373  | 24 |
|                                          | 35+ (very obese)         | 1702    | 3  | 1269  | 3  | 983   | 3  | 1253    | 4  | 615    | 2  | 720         | 3  | 1931   | 9  | 226    | 1   | 501   | 9  |
| Waist-to-hip ratio (sex-specific fifths) | 1                        | 9965    | 18 | 8639  | 22 | 11763 | 32 | 6134    | 20 | 5042   | 18 | 6297        | 23 | 2788   | 14 | 6312   | 31  | 396   | 7  |
|                                          | 2                        | 11073   | 20 | 7650  | 19 | 8431  | 23 | 5809    | 19 | 6412   | 23 | 5082        | 19 | 3013   | 15 | 4369   | 21  | 849   | 15 |
|                                          | 3                        | 12412   | 22 | 9021  | 23 | 7613  | 21 | 6674    | 22 | 7542   | 27 | 6321        | 24 | 4003   | 19 | 5135   | 25  | 1245  | 22 |
|                                          | 4                        | 10047   | 18 | 7073  | 18 | 4787  | 13 | 5567    | 18 | 4962   | 18 | 4530        | 17 | 3969   | 19 | 2663   | 13  | 1468  | 26 |
|                                          | 5                        | 13185   | 23 | 6974  | 18 | 4106  | 11 | 6586    | 21 | 3985   | 14 | 4597        | 17 | 6770   | 33 | 1975   | 10  | 1672  | 30 |
| Alcohol intake (drinks/day)              | 0                        | 1318    | 2  | 6752  | 17 | 4462  | 12 | 1186    | 4  | 4676   | 17 | 4148        | 15 | 5596   | 27 | 2516   | 12  | 2172  | 39 |
|                                          | (0,.5]                   | 11117   | 20 | 11997 | 30 | 14240 | 39 | 9934    | 32 | 6968   | 25 | 9427        | 35 | 7217   | 35 | 6708   | 33  | 1263  | 22 |
|                                          | (0.5,1]                  | 9546    | 17 | 3068  | 8  | 7989  | 22 | 5727    | 19 | 5780   | 21 | 3409        | 13 | 2656   | 13 | 3518   | 17  | 465   | 8  |
|                                          | (1,2]                    | 15191   | 27 | 6658  | 17 | 5908  | 16 | 5572    | 18 | 6427   | 23 | 4174        | 16 | 2405   | 12 | 3942   | 19  | 627   | 11 |
|                                          | (2,6]                    | 15858   | 28 | 9839  | 25 | 3860  | 11 | 7175    | 23 | 3924   | 14 | 5235        | 20 | 2159   | 11 | 3507   | 17  | 911   | 16 |
|                                          | >6 (women), (6,10] (men) | 3160    | 6  | 956   | 2  | 224   | 1  | 1008    | 3  | 152    | 1  | 383         | 1  | 378    | 2  | 263    | 1   | 159   | 3  |
|                                          | >10 (men)                | 492     | 1  | 87    | 0  | 17    | 0  | 168     | 1  | 16     | 0  | 51          | 0  | 132    | 1  | 0      | 0   | 33    | 1  |
| Diet                                     | unhealthy                | 7049    | 12 | 852   | 2  | 3225  | 9  | 2260    | 7  | 5819   | 21 | 2414        | 9  | 72     | 0  | 570    | 3   | 85    | 2  |
|                                          | moderately unhealthy     | 28959   | 51 | 11994 | 30 | 15186 | 41 | 18189   | 59 | 14616  | 52 | 13434       | 50 | 2278   | 11 | 7094   | 35  | 1215  | 22 |
|                                          | moderately healthy       | 14548   | 26 | 16018 | 41 | 10100 | 28 | 7637    | 25 | 5342   | 19 | 7406        | 28 | 6004   | 29 | 7770   | 38  | 2285  | 41 |
|                                          | healthy                  | 6126    | 11 | 10493 | 27 | 8189  | 22 | 2684    | 9  | 2166   | 8  | 3573        | 13 | 12189  | 59 | 5020   | 25  | 2045  | 36 |
| Physical activity                        | inactive                 | 6294    | 11 | 12166 | 31 | 12108 | 33 | 5978    | 19 | 6449   | 23 | 2421        | 9  | 10269  | 50 | 3575   | 17  | 2511  | 45 |
|                                          | moderately inactive      | 17299   | 31 | 15058 | 38 | 12078 | 33 | 11448   | 37 | 10691  | 38 | 7227        | 27 | 4908   | 24 | 8409   | 41  | 1789  | 32 |
|                                          | moderately active        | 13767   | 24 | 6724  | 17 | 7428  | 20 | 7739    | 25 | 6407   | 23 | 7012        | 26 | 3974   | 19 | 6655   | 33  | 842   | 15 |
|                                          | active                   | 19322   | 34 | 5409  | 14 | 5086  | 14 | 5605    | 18 | 4396   | 16 | 10167       | 38 | 1392   | 7  | 1815   | 9   | 488   | 9  |
