# Supplementary material for: Modifiable causes of premature death in middle-age in Western Europe: results from the EPIC cohort study
Source: PubMed Central journal article supplement (PMC4907105; doi:10.1186/s12916-016-0630-6), 2016-06-14
Supplement: 12916_2016_630_MOESM8_ESM.pdf [file 12916_2016_630_MOESM8_ESM.pdf]

S5 Table. Population attributable fractions of deaths prior to age 75 given the distribution of covariates in the EPIC cohort, using waist-to-hip ratio to assess for obesity.

| Covariate <sup>1</sup>       | All participants     |                         | Never-smokers        |                         | Current-smokers      |                         |
|------------------------------|----------------------|-------------------------|----------------------|-------------------------|----------------------|-------------------------|
|                              | Overall <sup>2</sup> | Cumulative <sup>3</sup> | Overall <sup>2</sup> | Cumulative <sup>3</sup> | Overall <sup>2</sup> | Cumulative <sup>3</sup> |
| Women and Men                |                      |                         |                      |                         |                      |                         |
| Smoking                      | 0.30 [0.30,0.31]     | 0.30 [0.30,0.31]        | -                    | -                       | 0.55 [0.54,0.56]     | 0.55 [0.54,0.56]        |
| Diet                         | 0.13 [0.11,0.16]     | 0.40 [0.38,0.41]        | 0.12 [0.10,0.14]     | 0.12 [0.10,0.14]        | 0.14 [0.12,0.17]     | 0.62 [0.61,0.63]        |
| Overweight and obesity (WHR) | 0.09 [0.08,0.11]     | 0.46 [0.44,0.47]        | 0.09 [0.08,0.11]     | 0.20 [0.18,0.23]        | 0.09 [0.07,0.11]     | 0.66 [0.65,0.67]        |
| High blood pressure          | 0.09 [0.07,0.10]     | 0.51 [0.49,0.52]        | 0.09 [0.07,0.11]     | 0.27 [0.25,0.30]        | 0.08 [0.06,0.09]     | 0.69 [0.68,0.70]        |
| Physical inactivity          | 0.07 [0.05,0.09]     | 0.54 [0.52,0.56]        | 0.08 [0.06,0.10]     | 0.33 [0.30,0.36]        | 0.06 [0.04,0.08]     | 0.71 [0.70,0.72]        |
| Alcohol intake               | 0.03 [0.03,0.04]     | 0.56 [0.54,0.58]        | 0.02 [0.01,0.02]     | 0.34 [0.31,0.37]        | 0.05 [0.04,0.05]     | 0.73 [0.71,0.74]        |
| <b>Combined</b>              | 0.56 [0.54,0.58]     |                         | 0.34 [0.31,0.37]     |                         | 0.73 [0.71,0.74]     |                         |
| Women                        |                      |                         |                      |                         |                      |                         |
| Smoking                      | 0.26 [0.25,0.26]     | 0.26 [0.25,0.26]        | -                    | -                       | 0.55 [0.54,0.56]     | 0.55 [0.54,0.56]        |
| Diet                         | 0.13 [0.10,0.16]     | 0.35 [0.33,0.38]        | 0.12 [0.09,0.15]     | 0.12 [0.09,0.15]        | 0.15 [0.12,0.18]     | 0.62 [0.60,0.64]        |
| Overweight and obesity (WHR) | 0.07 [0.04,0.09]     | 0.40 [0.37,0.42]        | 0.07 [0.04,0.09]     | 0.18 [0.15,0.21]        | 0.07 [0.04,0.09]     | 0.65 [0.63,0.67]        |
| High blood pressure          | 0.09 [0.07,0.11]     | 0.46 [0.43,0.48]        | 0.10 [0.08,0.12]     | 0.26 [0.23,0.30]        | 0.08 [0.06,0.10]     | 0.68 [0.66,0.70]        |
| Physical inactivity          | 0.06 [0.03,0.09]     | 0.49 [0.46,0.52]        | 0.06 [0.03,0.10]     | 0.31 [0.27,0.35]        | 0.05 [0.02,0.08]     | 0.70 [0.68,0.72]        |
| Alcohol intake               | 0.02 [0.01,0.02]     | 0.50 [0.47,0.52]        | 0.01 [0.01,0.02]     | 0.32 [0.28,0.35]        | 0.02 [0.01,0.03]     | 0.71 [0.69,0.72]        |
| <b>Combined</b>              | 0.50 [0.47,0.52]     |                         | 0.32 [0.28,0.35]     |                         | 0.71 [0.69,0.72]     |                         |
| Men                          |                      |                         |                      |                         |                      |                         |
| Smoking                      | 0.35 [0.33,0.36]     | 0.35 [0.33,0.36]        | -                    | -                       | 0.54 [0.53,0.56]     | 0.54 [0.53,0.56]        |
| Diet                         | 0.13 [0.09,0.16]     | 0.43 [0.41,0.46]        | 0.13 [0.09,0.16]     | 0.13 [0.09,0.16]        | 0.13 [0.09,0.17]     | 0.61 [0.59,0.63]        |
| Overweight and obesity (WHR) | 0.12 [0.10,0.15]     | 0.51 [0.48,0.54]        | 0.11 [0.09,0.14]     | 0.22 [0.18,0.26]        | 0.12 [0.10,0.14]     | 0.67 [0.64,0.69]        |
| High blood pressure          | 0.08 [0.04,0.11]     | 0.55 [0.52,0.58]        | 0.08 [0.04,0.11]     | 0.29 [0.24,0.33]        | 0.06 [0.03,0.10]     | 0.69 [0.67,0.71]        |
| Physical inactivity          | 0.07 [0.04,0.09]     | 0.59 [0.55,0.61]        | 0.07 [0.04,0.09]     | 0.34 [0.29,0.38]        | 0.06 [0.04,0.09]     | 0.72 [0.69,0.74]        |
| Alcohol intake               | 0.05 [0.04,0.07]     | 0.61 [0.58,0.64]        | 0.03 [0.02,0.05]     | 0.36 [0.31,0.40]        | 0.07 [0.05,0.08]     | 0.74 [0.72,0.76]        |
| <b>Combined</b>              | 0.61 [0.58,0.64]     |                         | 0.36 [0.31,0.40]     |                         | 0.74 [0.72,0.76]     |                         |

<sup>1</sup> Attributable fractions were calculated based on the difference in expected cumulative risk given the observed covariate distributions in EPIC and the expected cumulative risk under the following scenarios. **Smoking:** A population of never smokers. **Diet:** A population of people in the *healthy* category. **Blood pressure:** A population of people with normal blood pressure. **High alcohol intake:** A population who drink at most 1-2 drinks per day. **Physical Activity:** A population of people in the *active* category. **Overweight and obesity:** A population of people with WHR below the lowest sex-specific quintile. These attributable risks thus represent a best case, in that they are calculated based on a hypothetical reference population with risk factors removed entirely.

<sup>2</sup> Estimated using predictions from a model mutually adjusted for all listed covariates as well as age at baseline. Attributable fractions are based on modifying one covariate at a time, with the distribution of the remaining covariates left as observed in EPIC.

<sup>3</sup> The cumulative attributable fraction after the sequential addition of each covariate.
